# Supplementary material for: Fatty acid profile of Romanian’s common bean (Phaseolus vulgaris L.) lipid fractions and their complexation ability by β-cyclodextrin
Source: PubMed Central journal article supplement (PMC6874339; doi:10.1371/journal.pone.0225474), 2019-11-22
Supplement: pone.0225474.s001.pdf [file pone.0225474.s001.pdf]

# SUPPORTING INFORMATION

(*PLoS ONE*)

## Fatty acid profile of Romanian's common bean (*Phaseolus vulgaris* L.) lipid fractions and their complexation ability by $\beta$ -cyclodextrin

Ioan David<sup>1¶</sup>, Manuela D. Orboi<sup>2¶</sup>, Marius D. Simandi<sup>1</sup>, Cosmina A. Chirilă<sup>1</sup>, Corina I. Megyesi<sup>1</sup>, Laura Rădulescu<sup>1</sup>, Lavinia P. Drăghia<sup>3</sup>, Alexandra T. Lukinich-Gruia<sup>3</sup>, Cornelia Muntean<sup>4,5</sup>, Daniel I. Hădărugă<sup>6</sup>, Nicoleta G. Hădărugă<sup>1\*</sup>

<sup>1</sup> Department of Food Science, Banat's University of Agricultural Sciences and Veterinary Medicine "King Michael I of Romania" from Timișoara, Timișoara, Romania

<sup>2</sup> Department of Economics and Company Financing, Banat's University of Agricultural Sciences and Veterinary Medicine "King Michael I of Romania" from Timișoara, Timișoara, Romania

<sup>3</sup> Centre for Gene and Cellular Therapies in the Treatment of Cancer – OncoGen, Clinical County Hospital of Timișoara, Timișoara, Romania

<sup>4</sup> Department of Applied Chemistry and Engineering of Inorganic Compounds and Environment, Polytechnic University of Timișoara, Timișoara, Romania

<sup>5</sup> Research Institute for Renewable Energy, Polytechnic University of Timișoara, Timișoara, Romania

<sup>6</sup> Department of Applied Chemistry, Organic and Natural Compounds Engineering, Polytechnic University of Timișoara, Timișoara, Romania

\* Corresponding author

E-mail: nico\_hadaruga@yahoo.com (NGH)

¶ These authors contributed equally to this work. They are both principal authors.

# Gas chromatography – mass spectrometry (GC-MS) data for the derivatized common bean lipid fractions

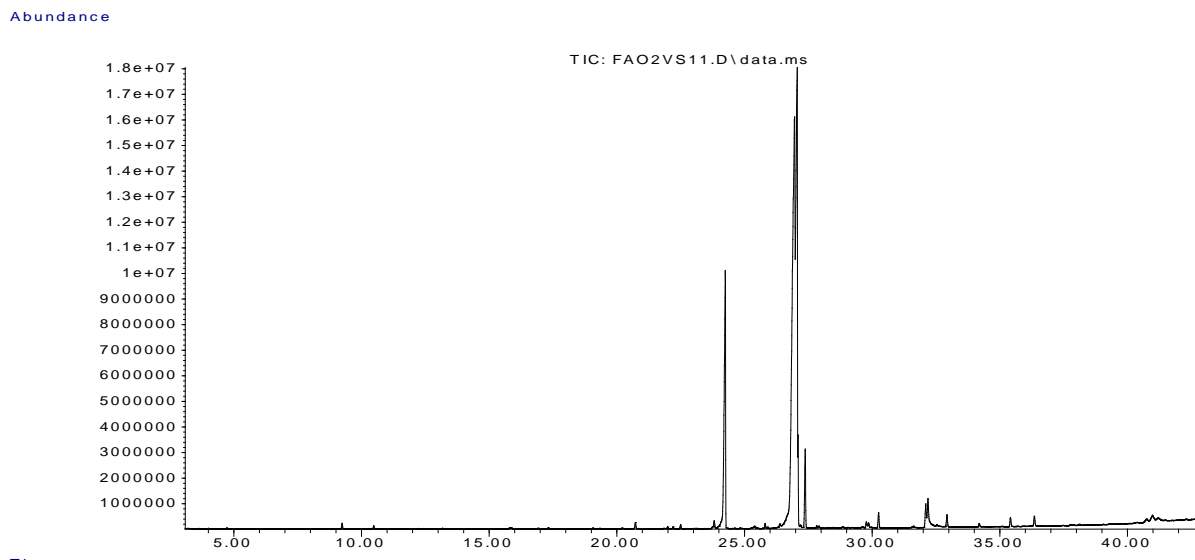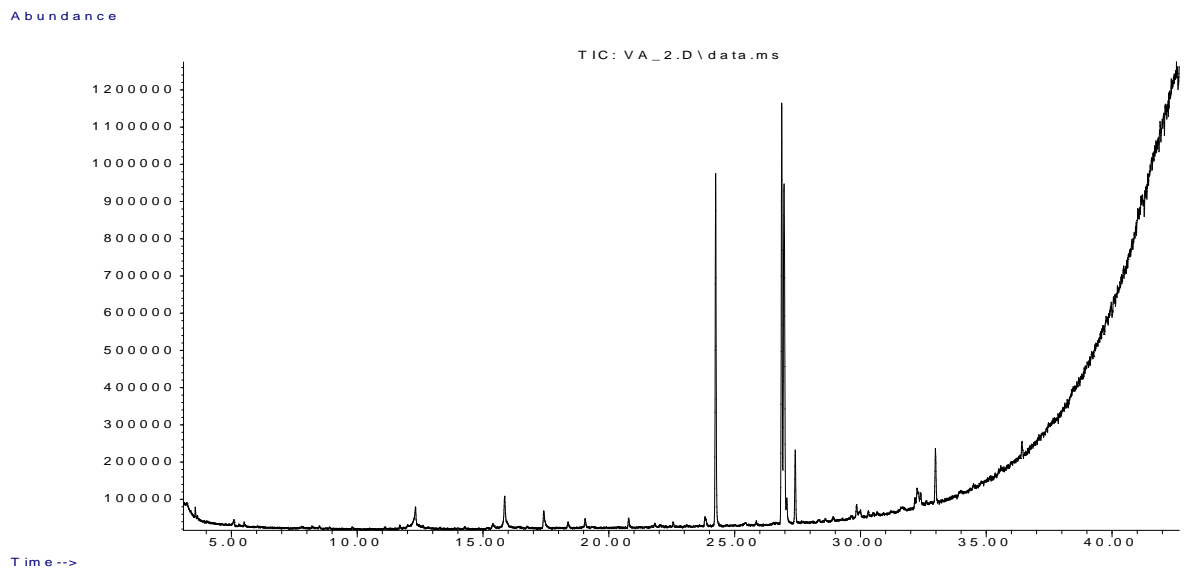

**Figure A. Gas chromatogram from the GC-MS analysis of the derivatized lipid fraction of beans (code CBO-NE, duplicate “a”; raw – top, and encapsulated - bottom)**

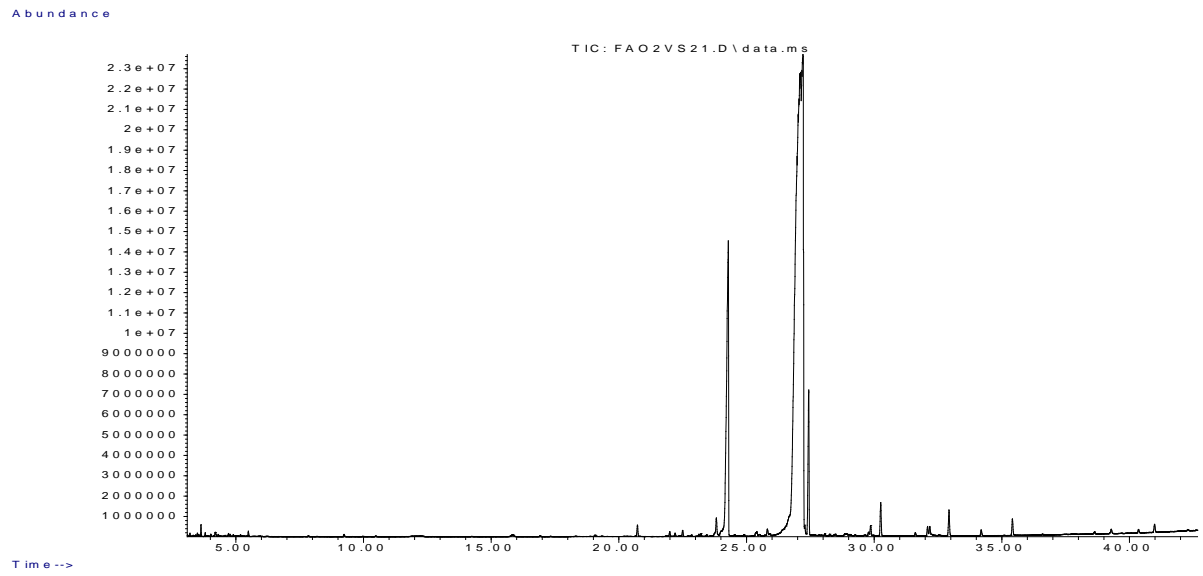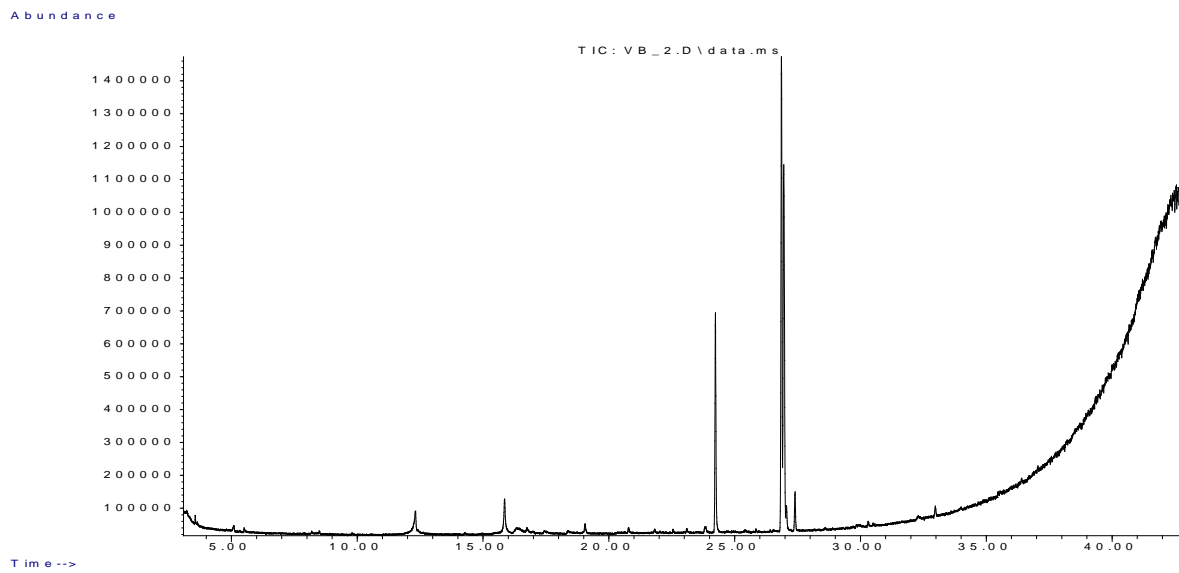

**Figure B. Gas chromatogram from the GC-MS analysis of the derivatized lipid fraction of beans (code CBO-NE, duplicate “b”; raw – top, and encapsulated - bottom)**

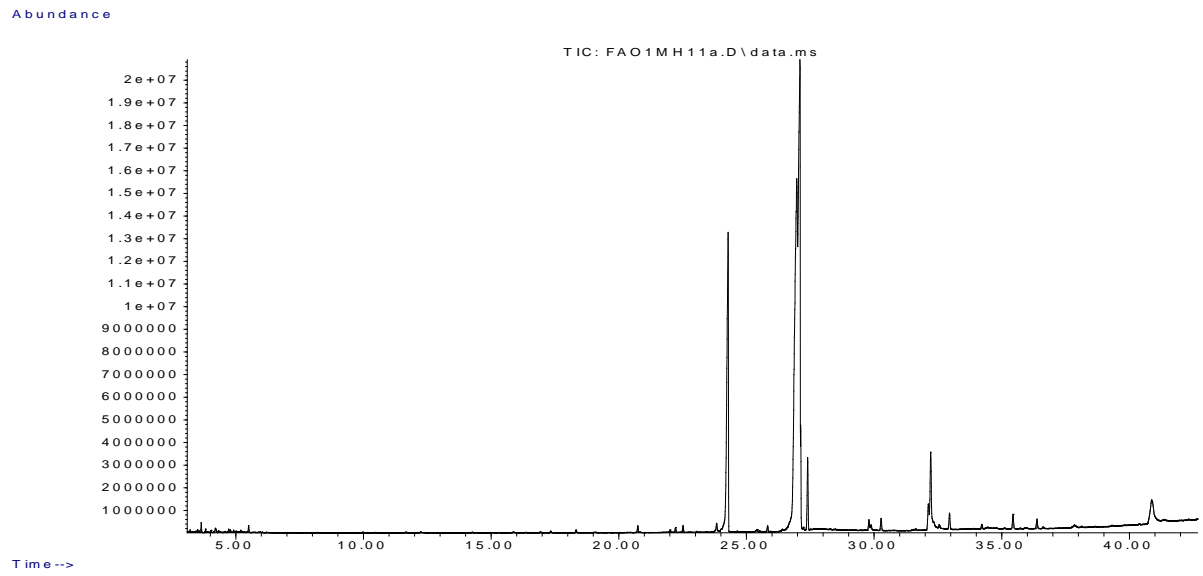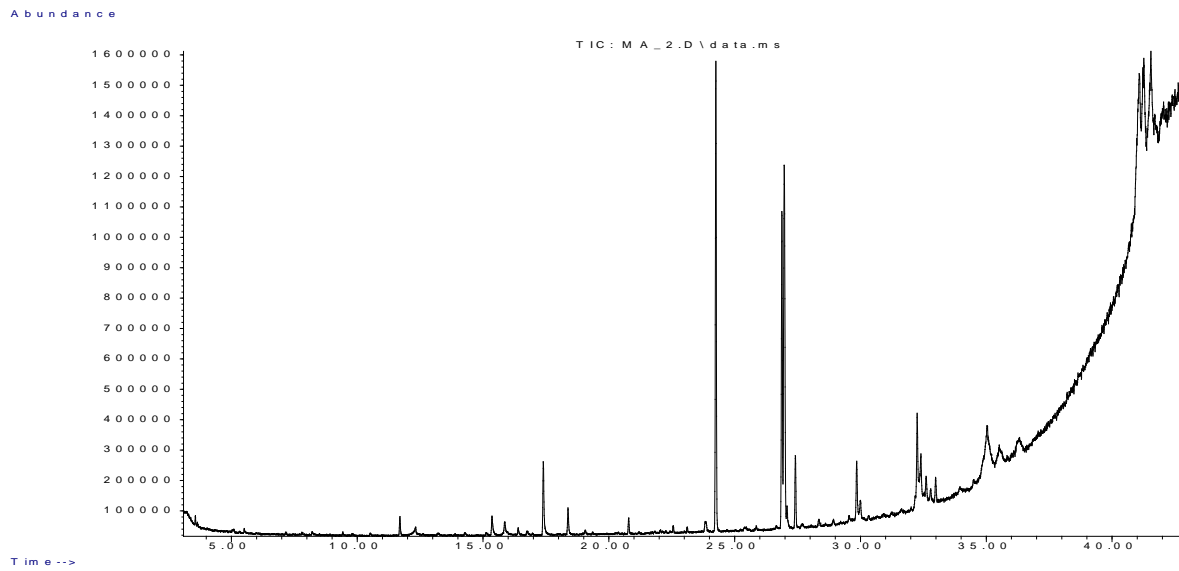

**Figure C. Gas chromatogram from the GC-MS analysis of the derivatized lipid fraction of beans (code CBO-SW, duplicate “a”; raw – top, and encapsulated - bottom)**

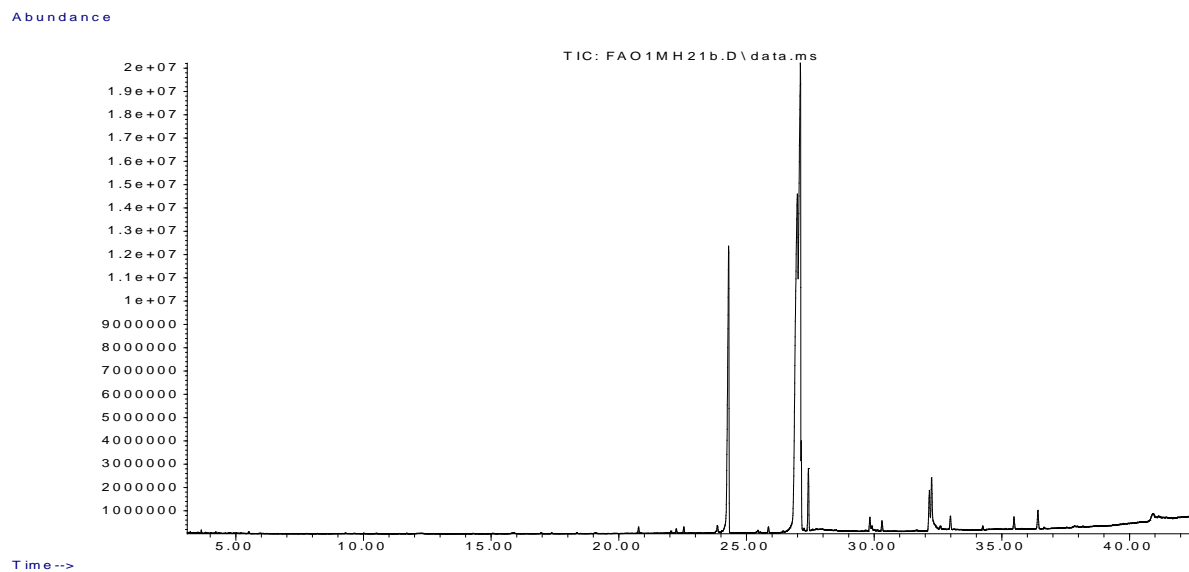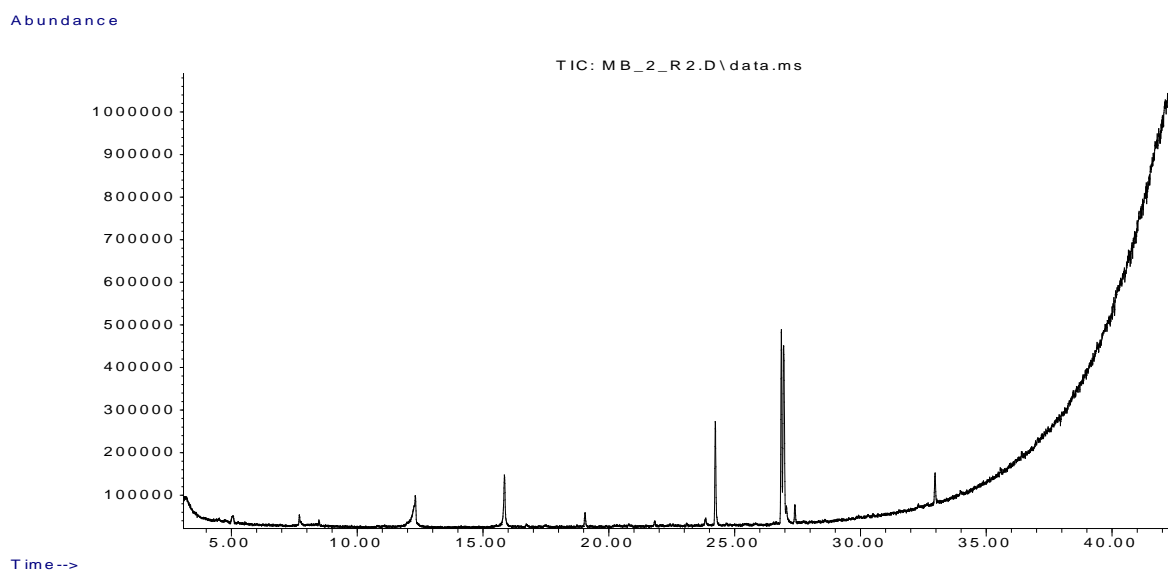

**Figure D. Gas chromatogram from the GC-MS analysis of the derivatized lipid fraction of beans (code CBO-SW, duplicate “b”; raw – top, and encapsulated - bottom)**

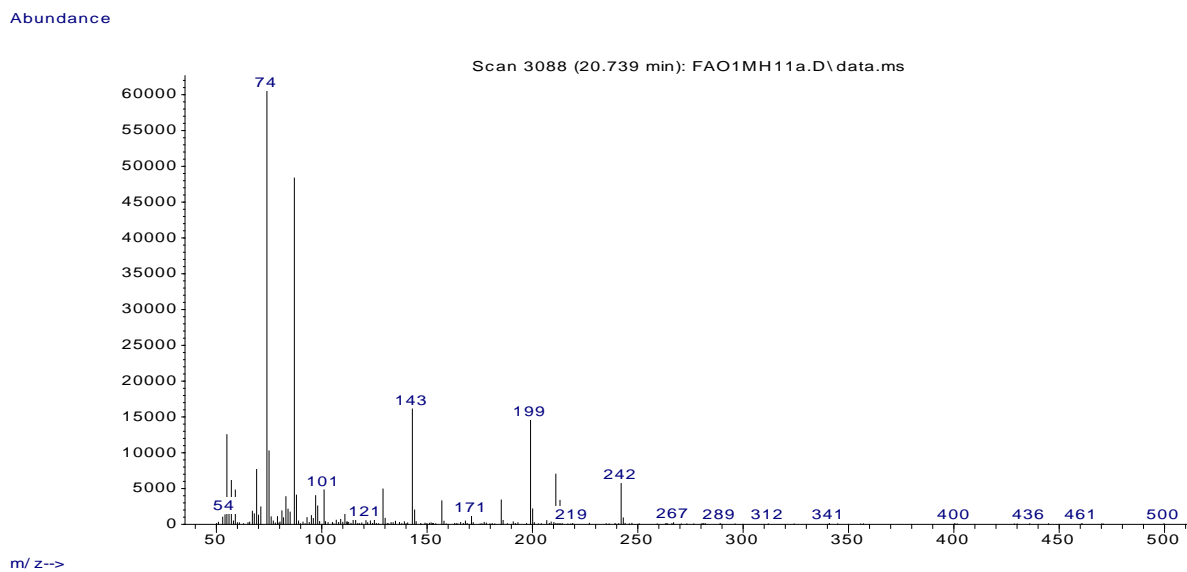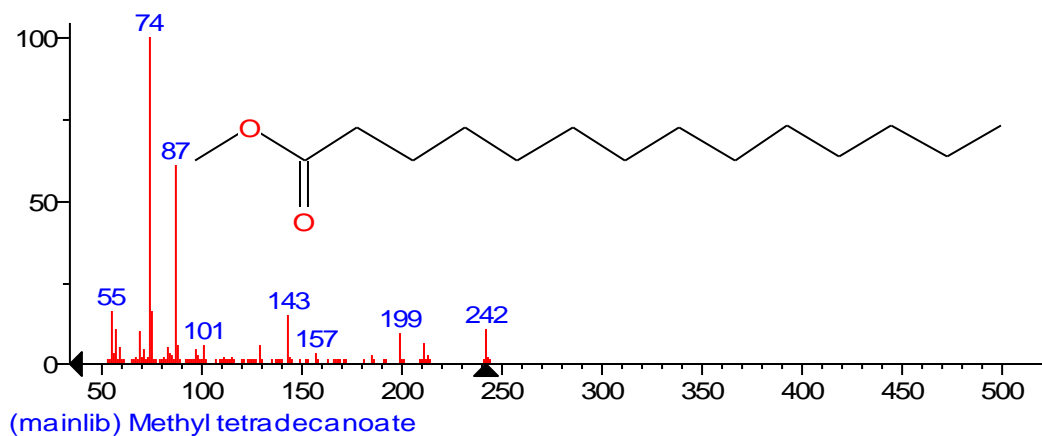

Figure E. MS spectra of myristic acid (methyl ester) from the GC-MS analysis of the derivatized beans lipid fractions (experimental – top and from the NIST database – bottom)

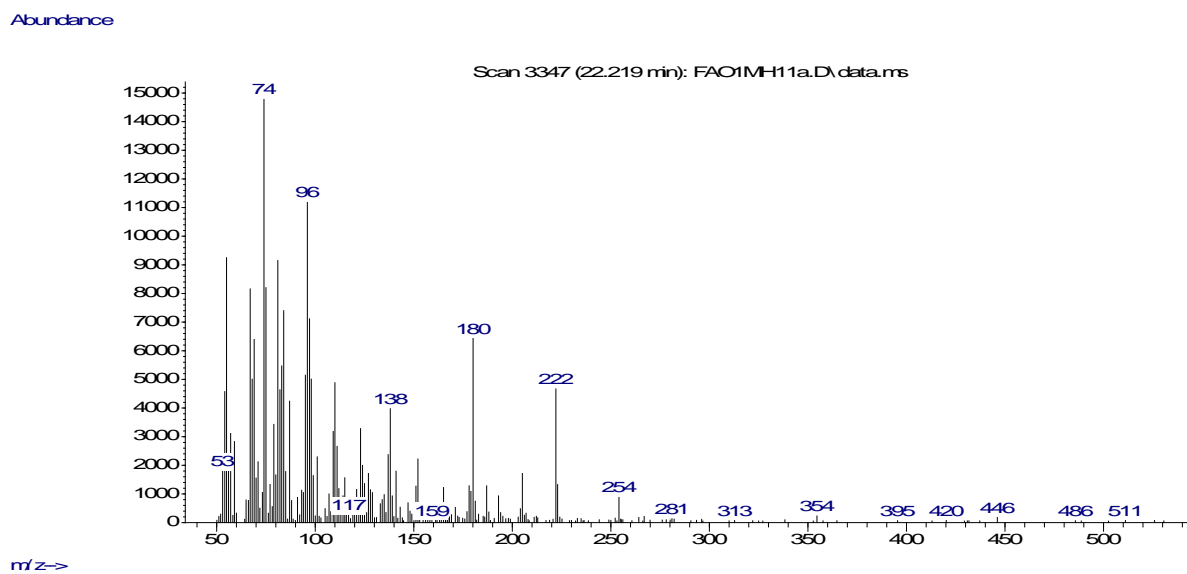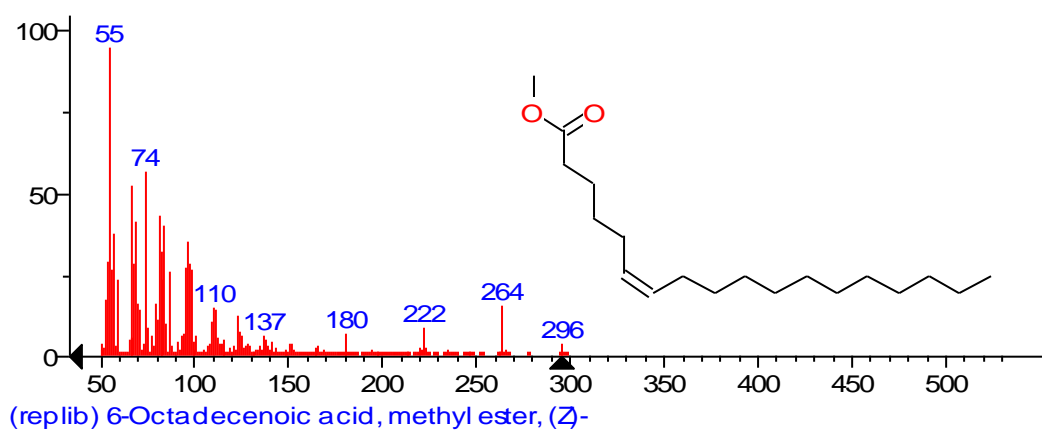

Figure F. MS spectra of petroselinic acid (methyl ester) from the GC-MS analysis of the derivatized beans lipid fractions (experimental – top and from the NIST database – bottom)

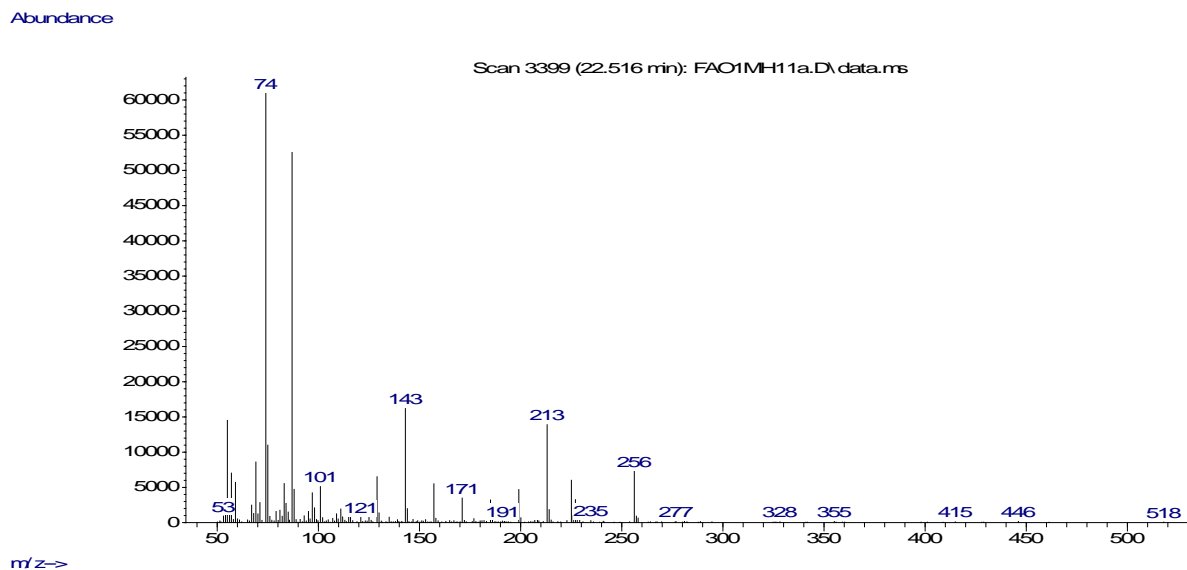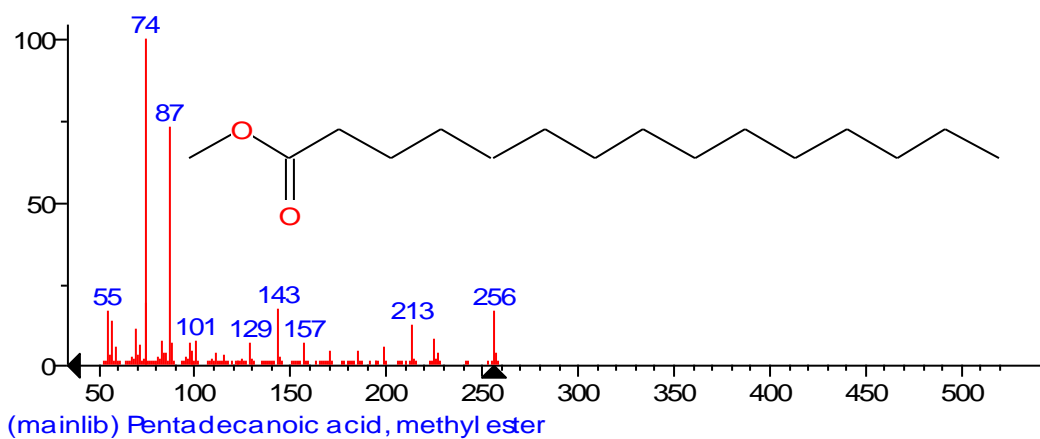

Figure G. MS spectra of pentadecanoic acid (methyl ester) from the GC-MS analysis of the derivatized beans lipid fractions (experimental – top and from the NIST database – bottom)



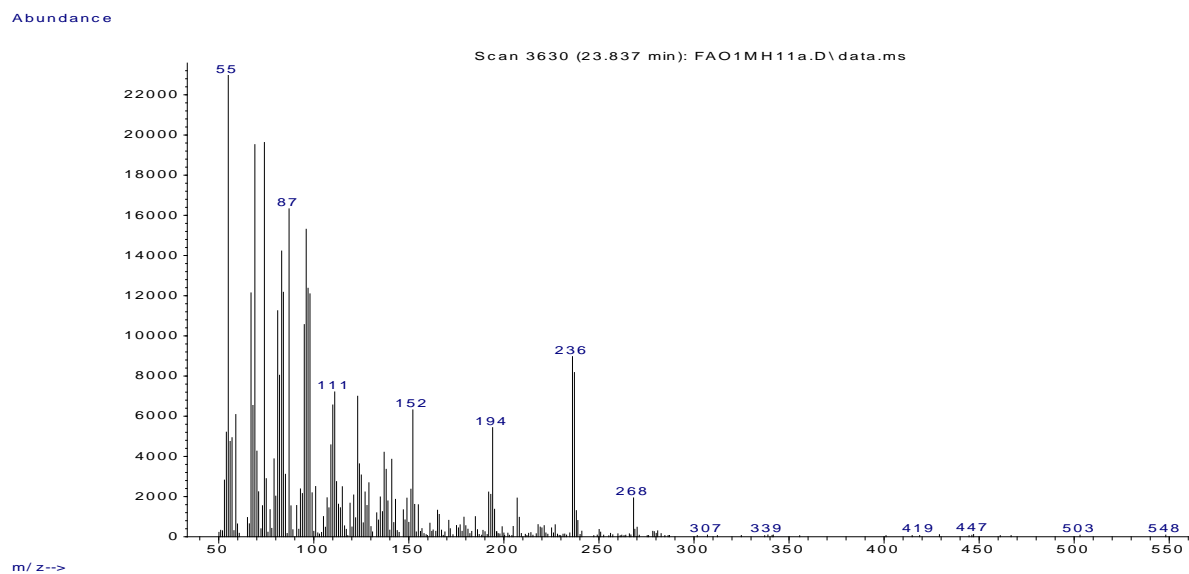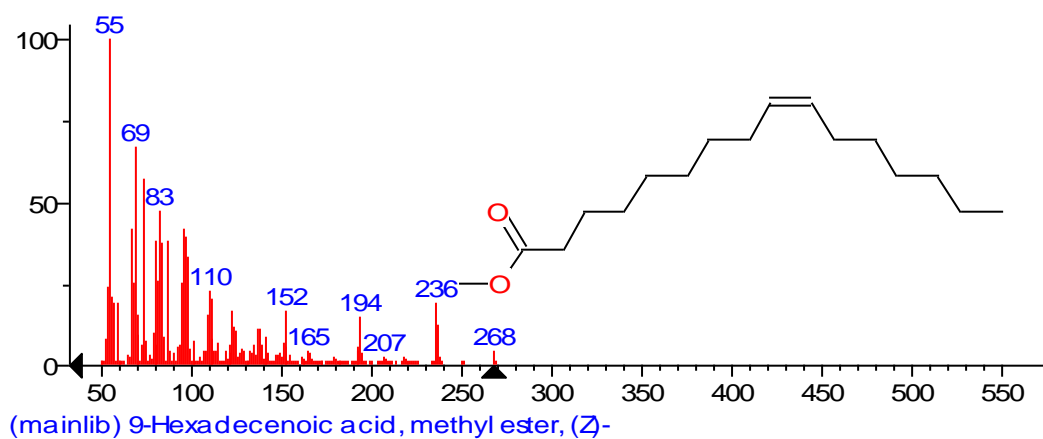

**Figure H. MS spectra of palmitoleic acid (methyl ester) from the GC-MS analysis of the derivatized beans lipid fractions (experimental – top and from the NIST database – bottom)**

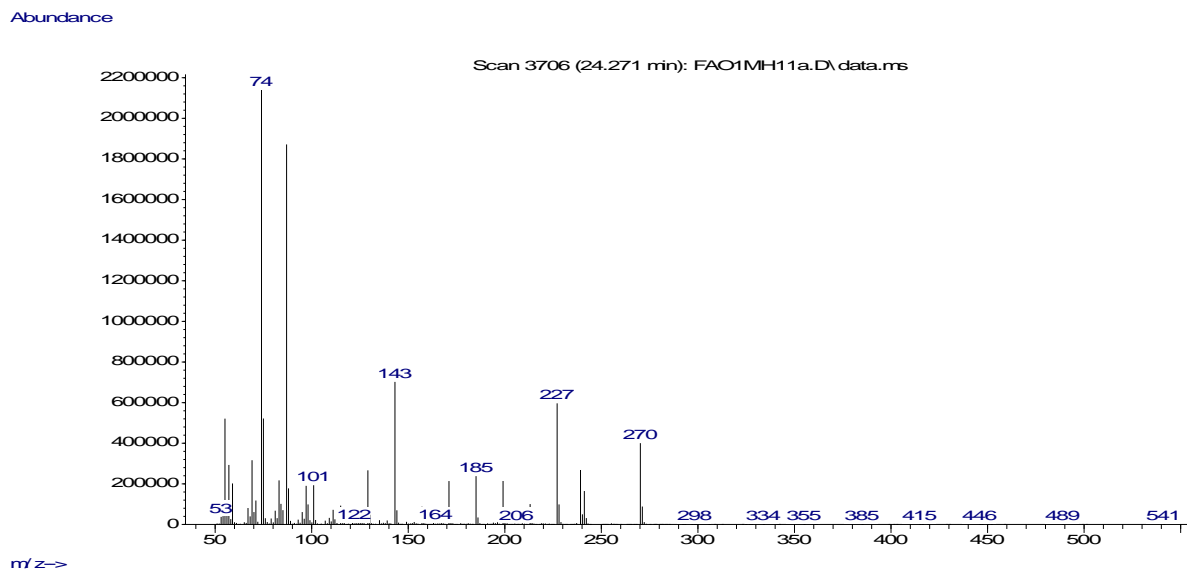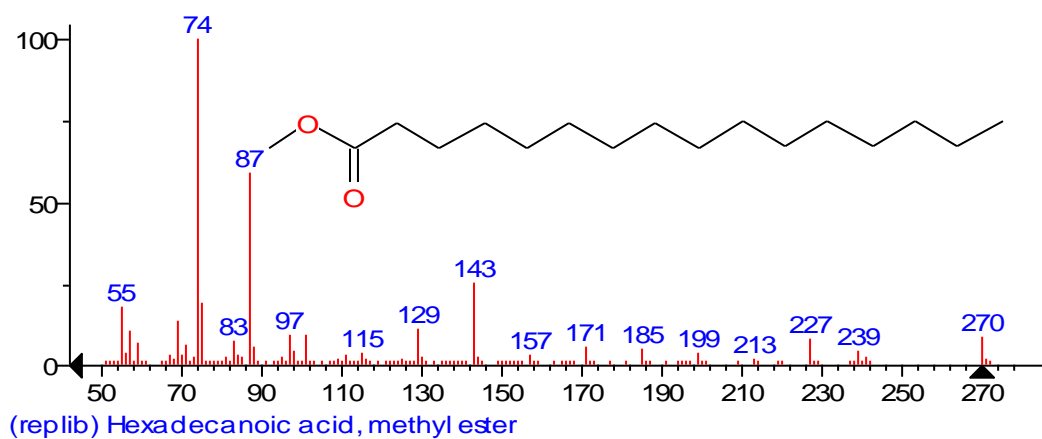

Figure I. MS spectra of palmitic acid (methyl ester) from the GC-MS analysis of the derivatized beans lipid fractions (experimental – top and from the NIST database – bottom)

Abundance

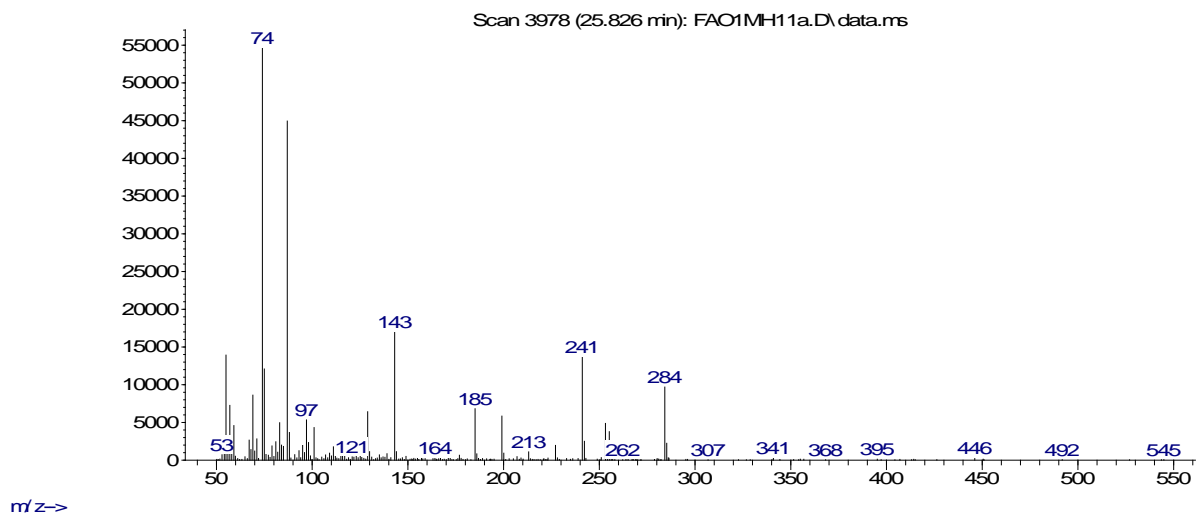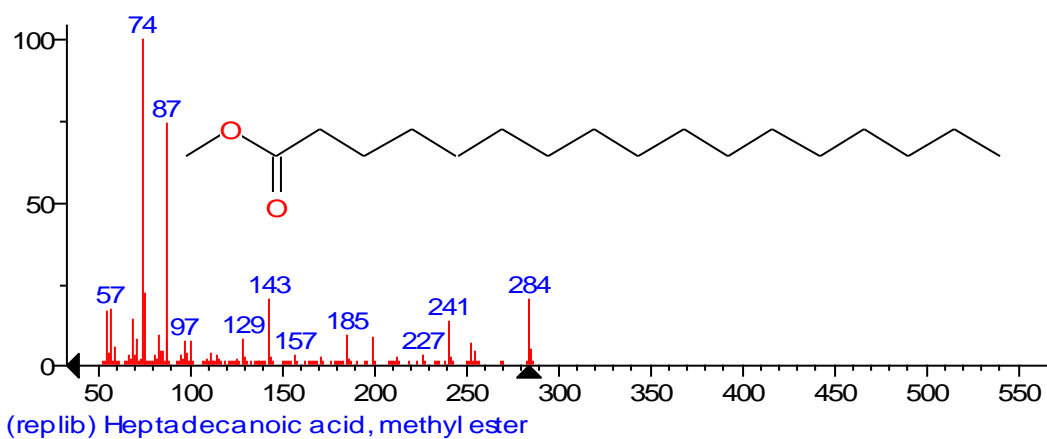

Figure J. MS spectra of margaric acid (methyl ester) from the GC-MS analysis of the derivatized beans lipid fractions (experimental – top and from the NIST database – bottom)

Abundance

Scan 4169 (26.917 min): FAO1MH11a.D\data.ms

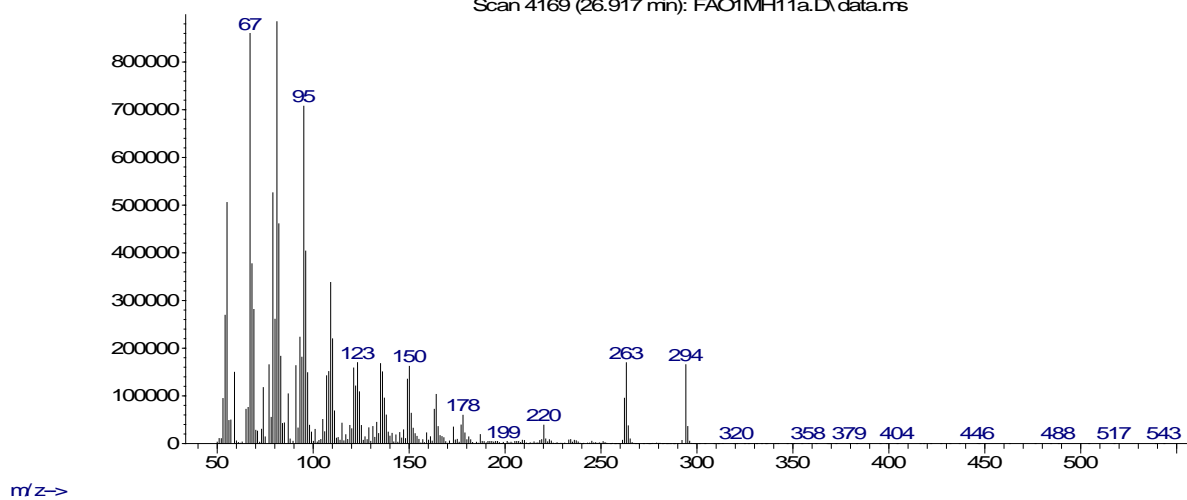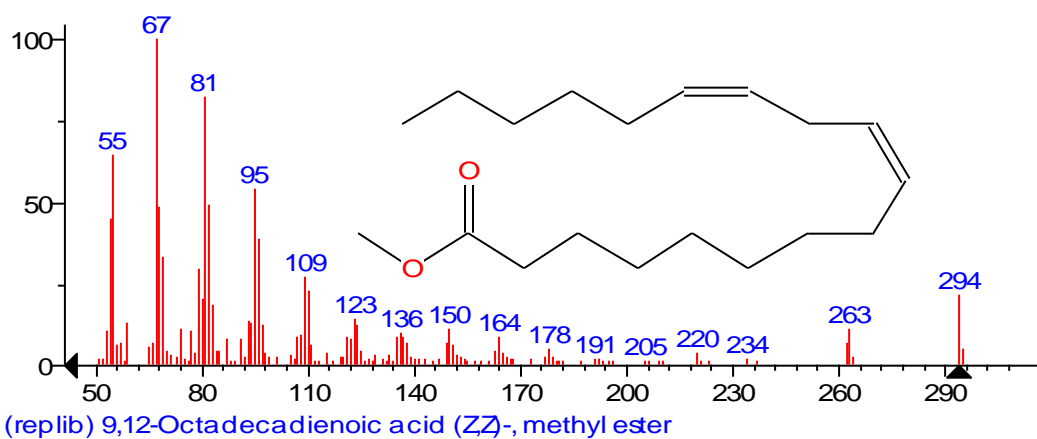

Figure K. MS spectra of linoleic acid (methyl ester) from the GC-MS analysis of the derivatized beans lipid fractions (experimental – top and from the NIST database – bottom)

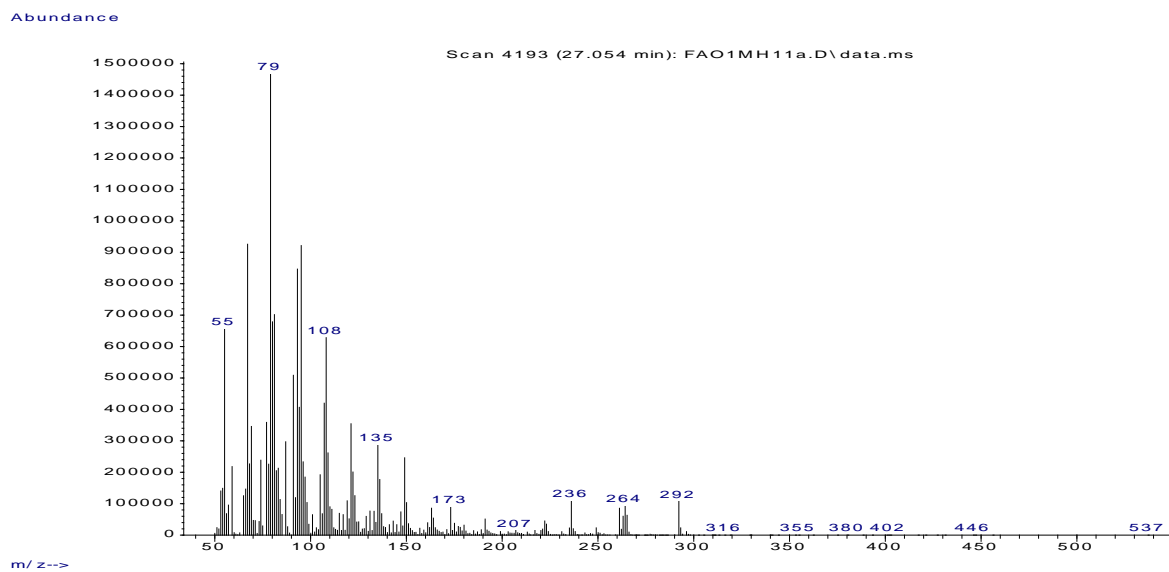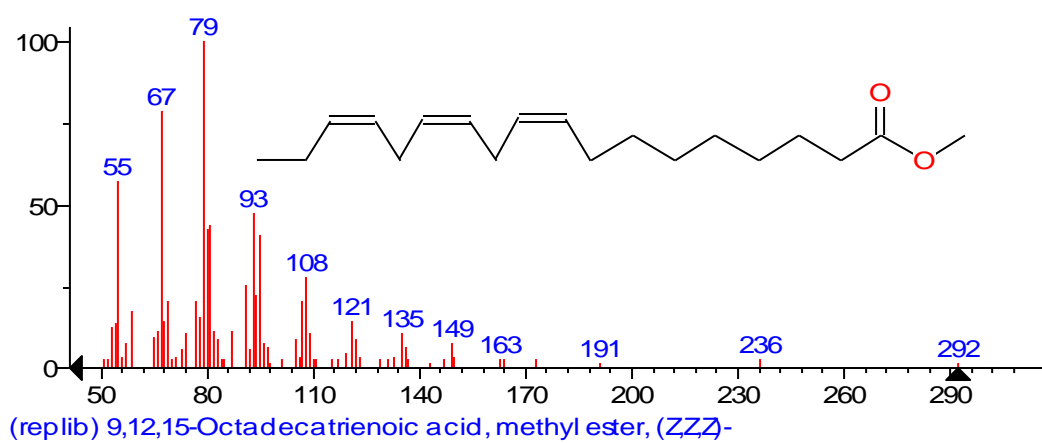

**Figure L. MS spectra of  $\alpha$ -linolenic acid (methyl ester) from the GC-MS analysis of the derivatized beans lipid fractions (experimental – top and from the NIST database – bottom)**

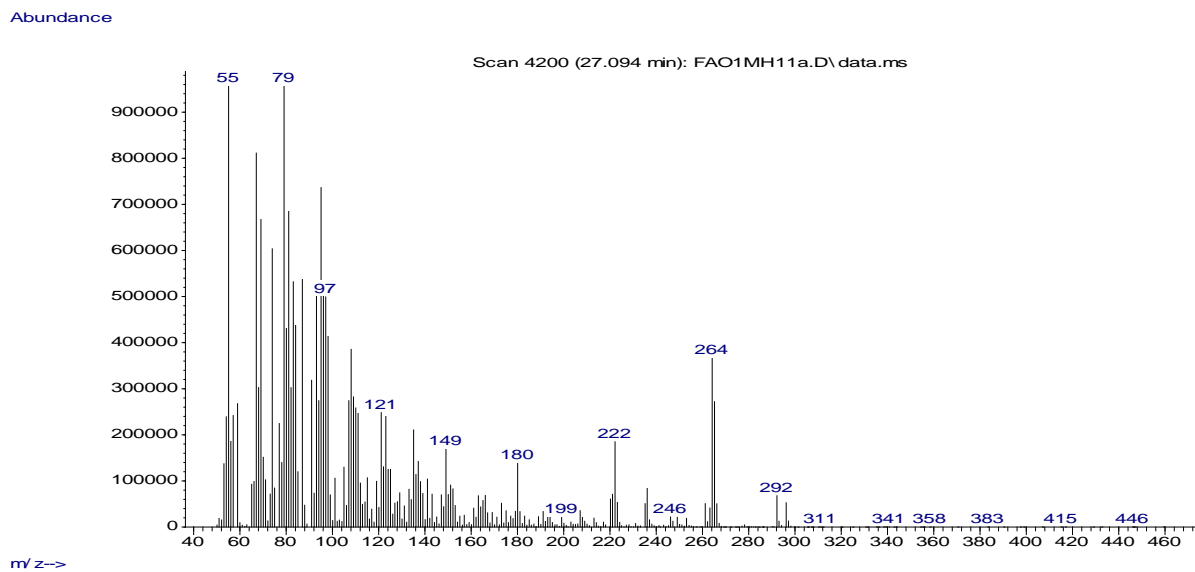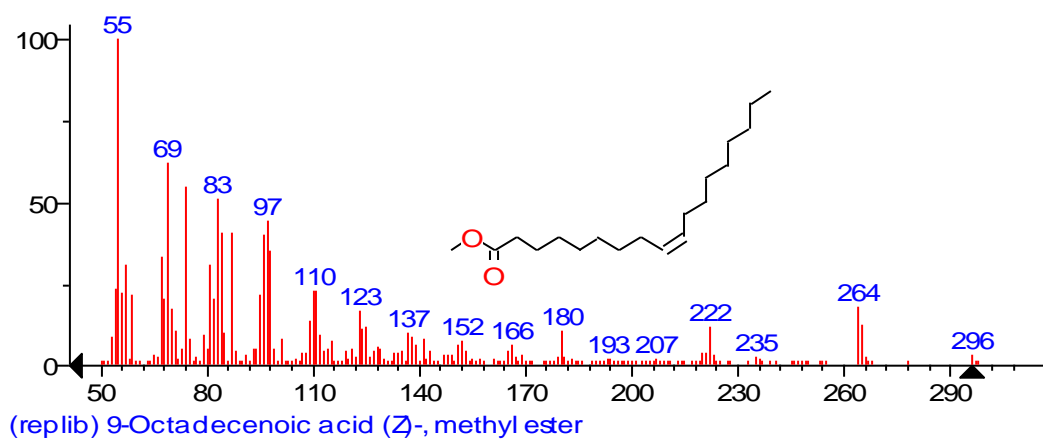

Figure M. MS spectra of oleic acid (methyl ester) from the GC-MS analysis of the derivatized beans lipid fractions (experimental – top and from the NIST database – bottom)

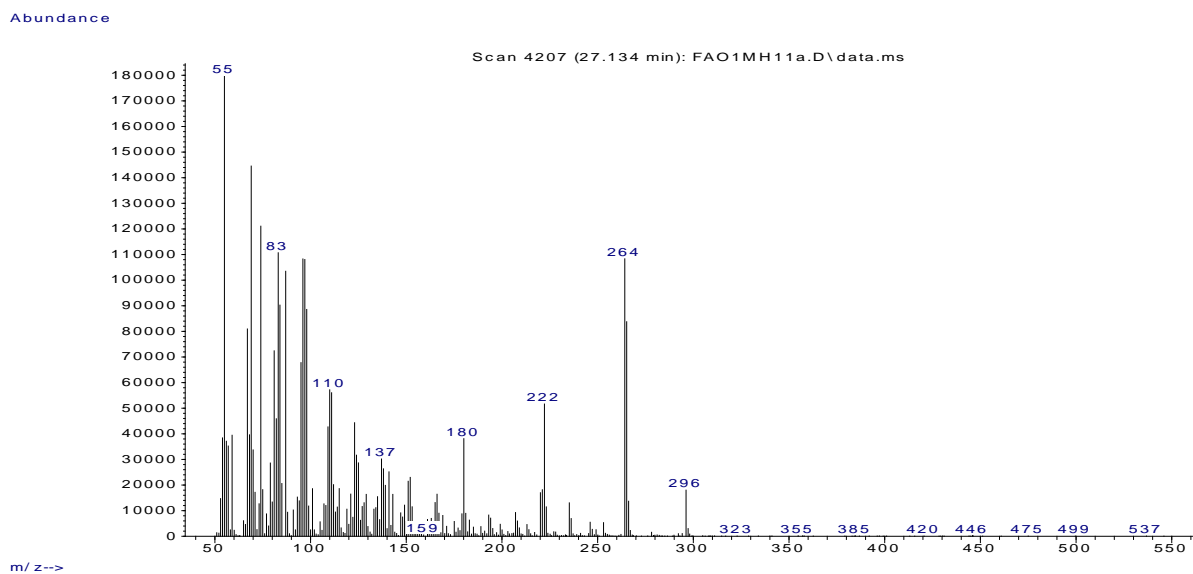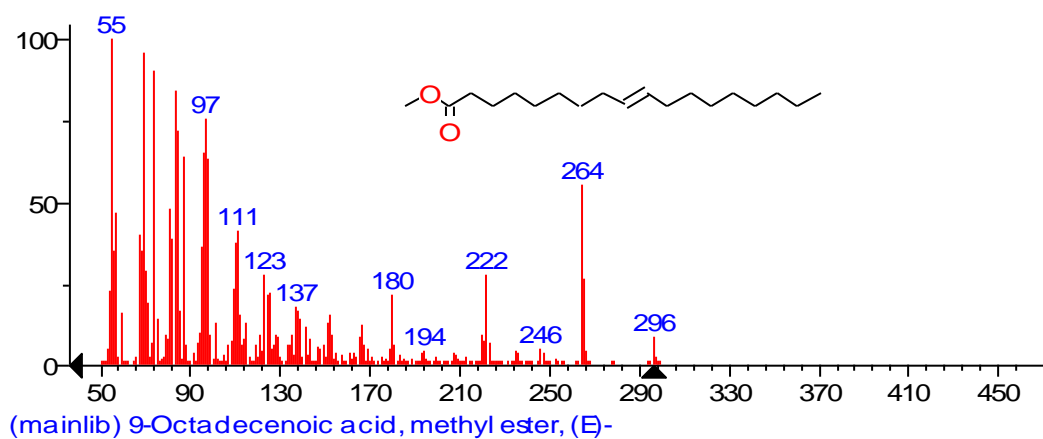

Figure N. MS spectra of elaidic acid (methyl ester) from the GC-MS analysis of the derivatized beans lipid fractions (experimental – top and from the NIST database – bottom)

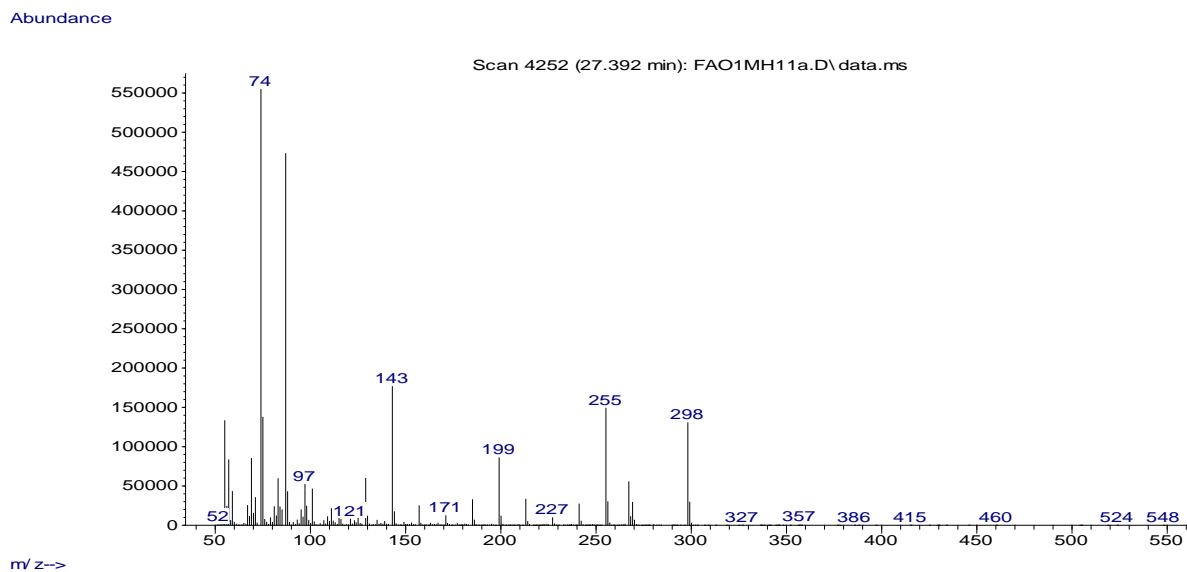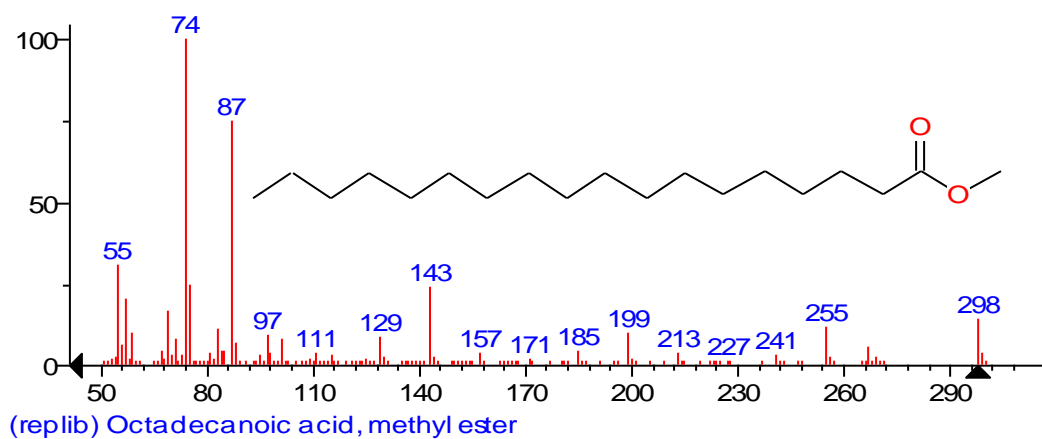

Figure O. MS spectra of stearic acid (methyl ester) from the GC-MS analysis of the derivatized beans lipid fractions (experimental – top and from the NIST database – bottom)



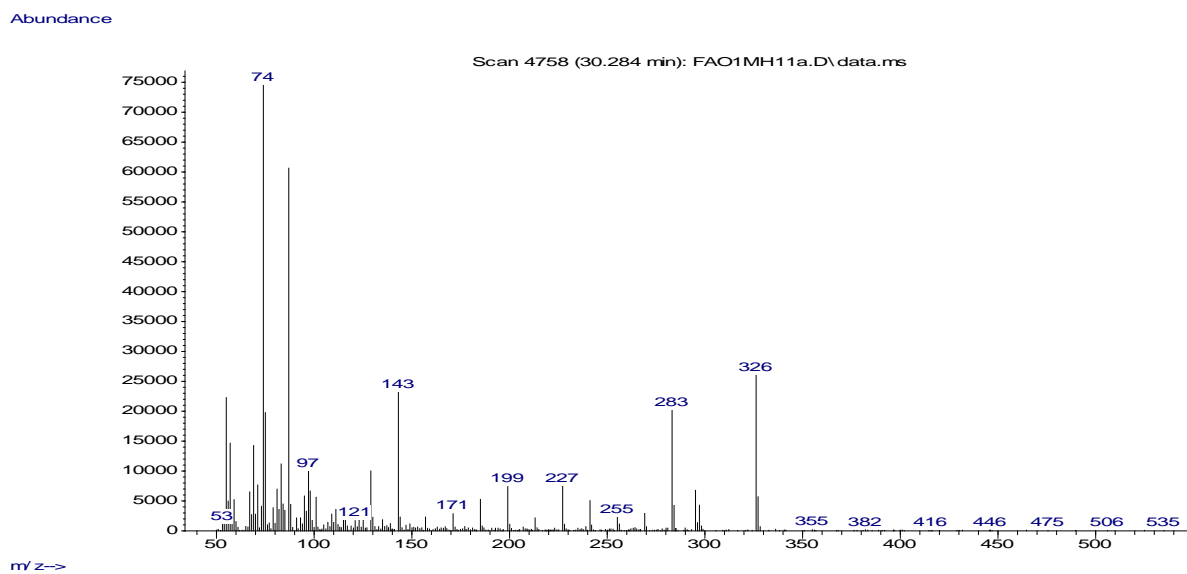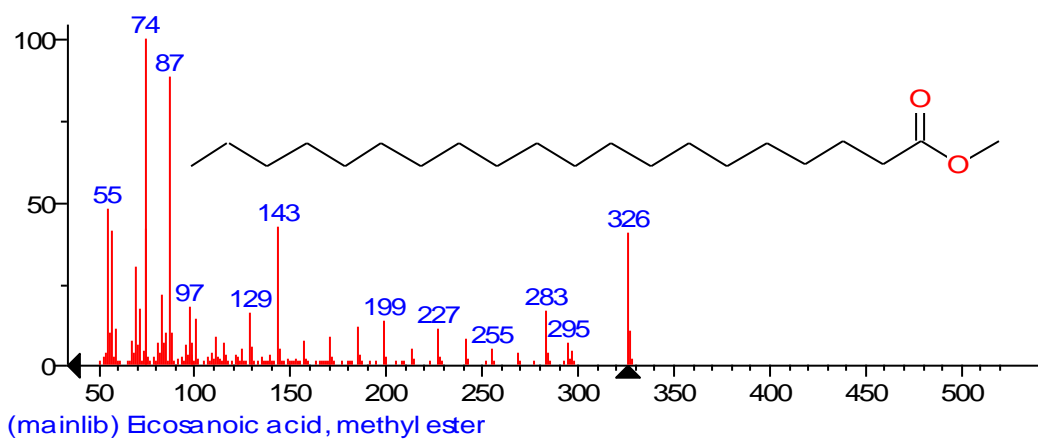

Figure P. MS spectra of arachidic acid (methyl ester) from the GC-MS analysis of the derivatized beans lipid fractions (experimental – top and from the NIST database – bottom)

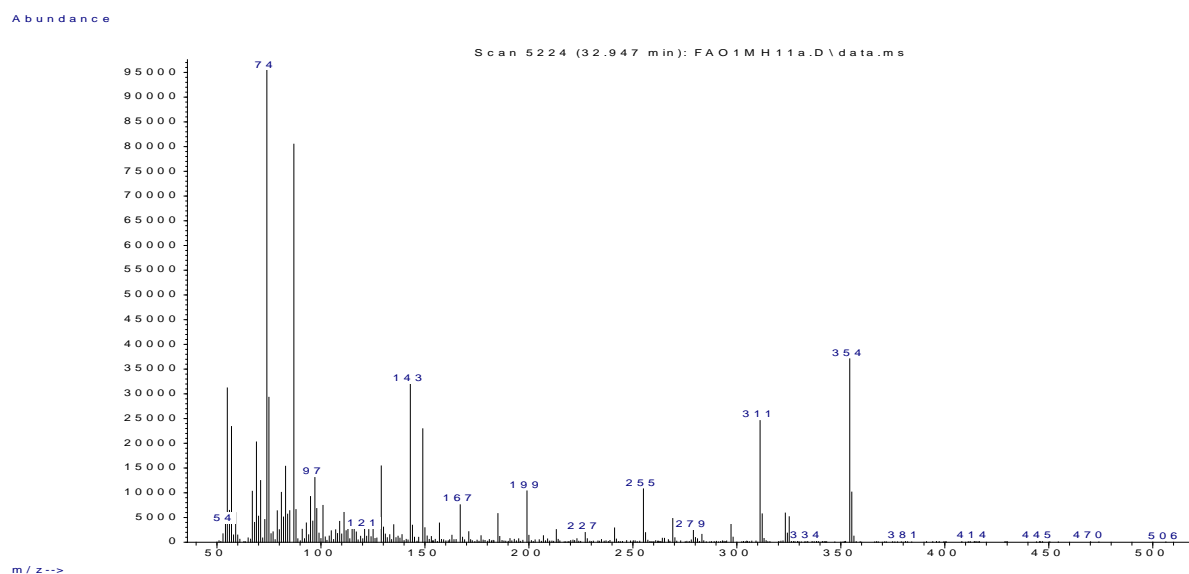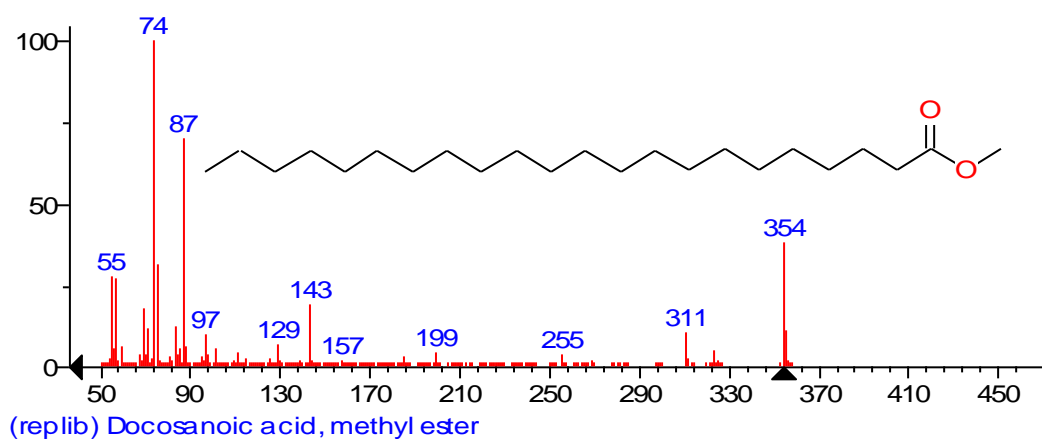

Figure Q. MS spectra of behenic acid (methyl ester) from the GC-MS analysis of the derivatized beans lipid fractions (experimental – top and from the NIST database – bottom)

Abundance

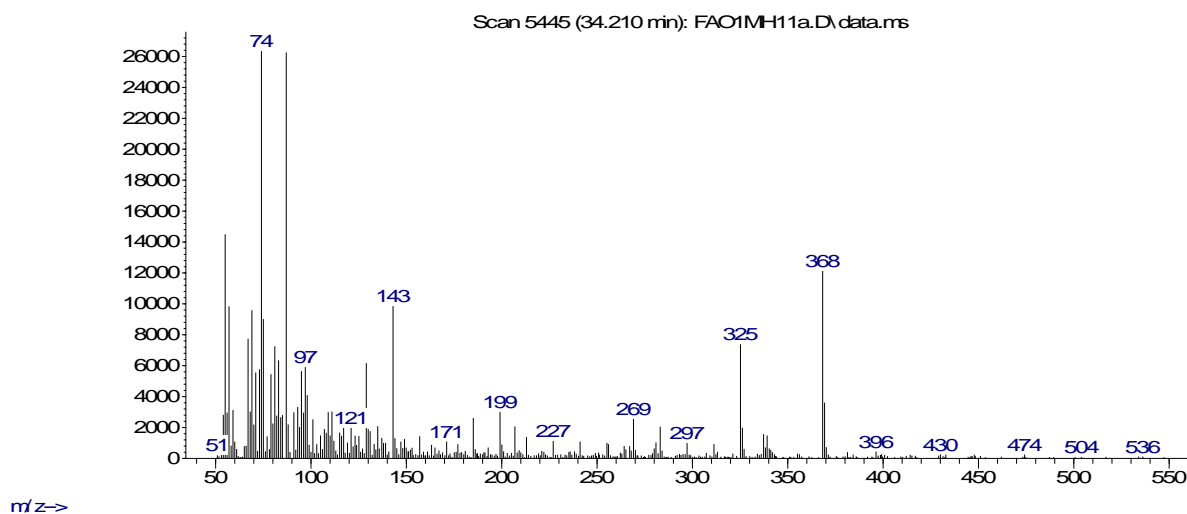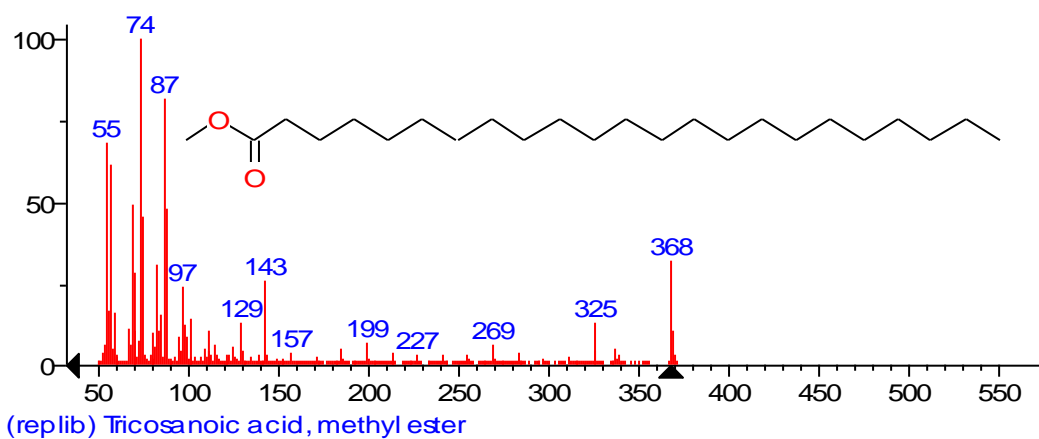

Figure R. MS spectra of tricosanoic acid (methyl ester) from the GC-MS analysis of the derivatized beans lipid fractions (experimental – top and from the NIST database – bottom)

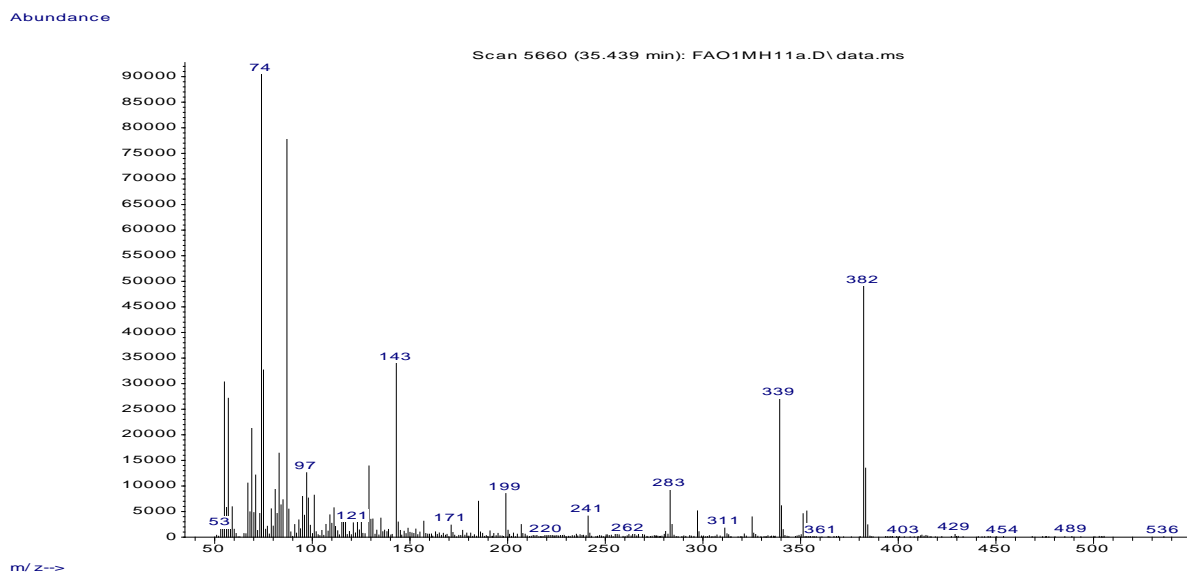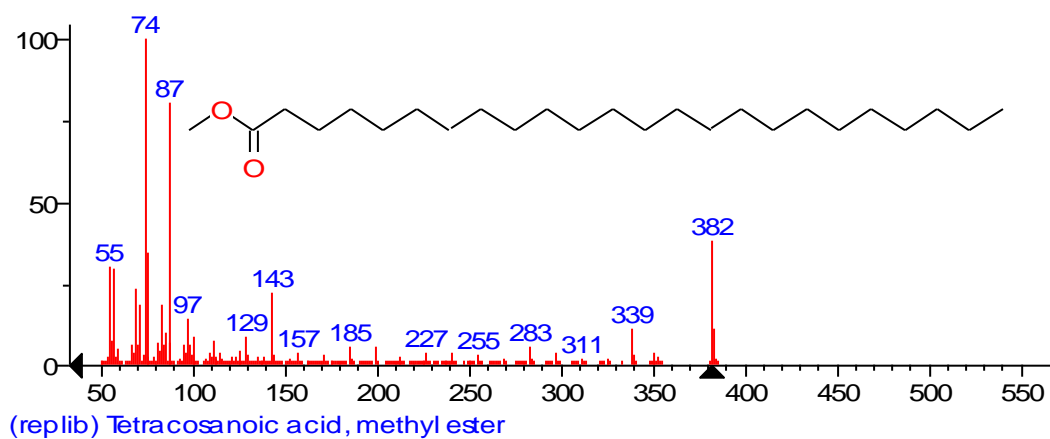

Figure S. MS spectra of lignoceric acid (methyl ester) from the GC-MS analysis of the derivatized beans lipid fractions (experimental – top and from the NIST database – bottom)

## Fourier transform infrared spectroscopy (FTIR) analysis of $\beta$ -cyclodextrin/common beans oil complexes

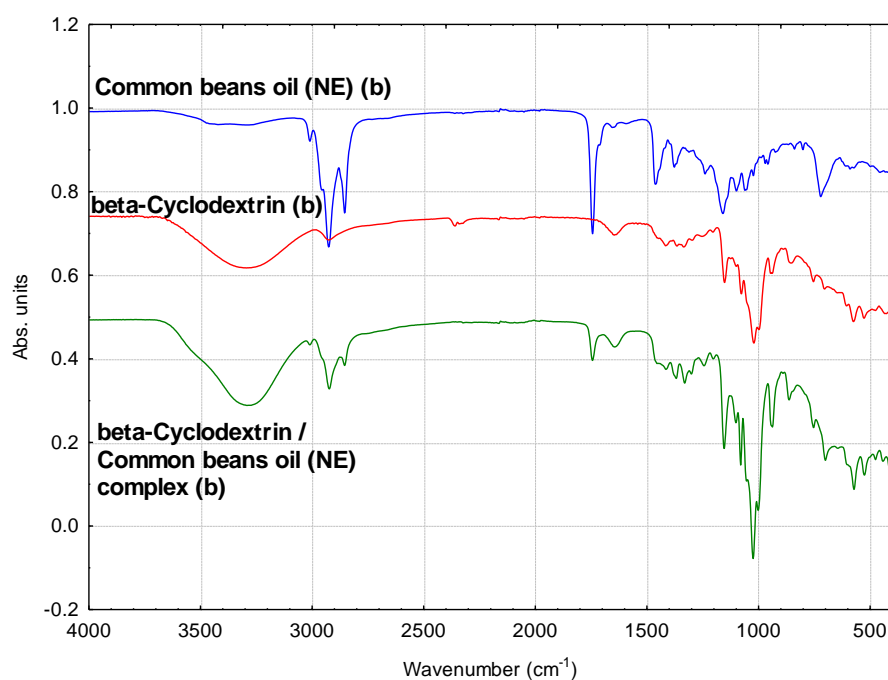

Figure T. Fourier transform infrared spectroscopy (FTIR) data for CBO-NE (blue),  $\beta$ -CD (red) and  $\beta$ -CD/CBO-NE complex (green) (duplicates “b”)

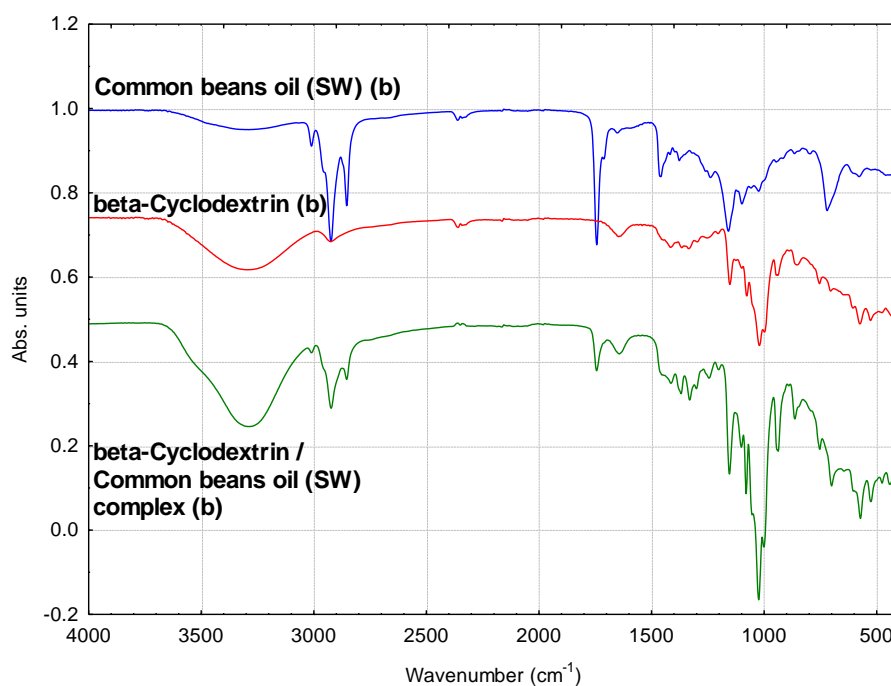

Figure U. Fourier transform infrared spectroscopy (FTIR) data for CBO-SW (blue),  $\beta$ -CD (red) and  $\beta$ -CD/CBO-SW complex (green) (duplicates “b”)

## Powder X-Ray diffractometry (PXRD) analysis of $\beta$ -cyclodextrin/common beans oil complexes

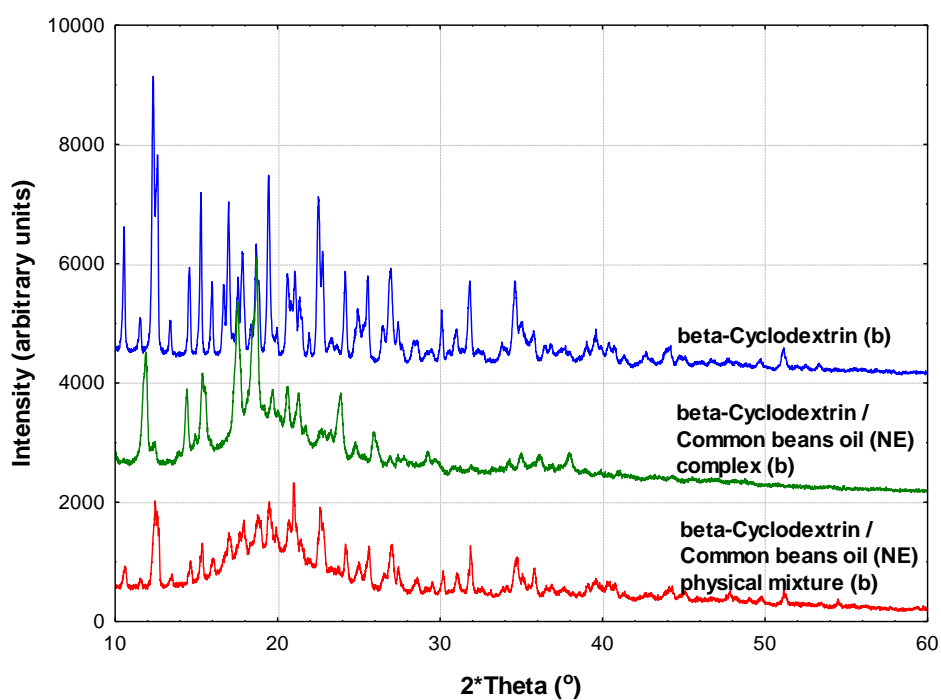

Figure V. Powder X-Ray diffractometry (PXRD) data for  $\beta$ -CD (blue),  $\beta$ -CD/CBO-NE complex (green),  $\beta$ -CD + CBO-NE physical mixture (red) (duplicates “b”)

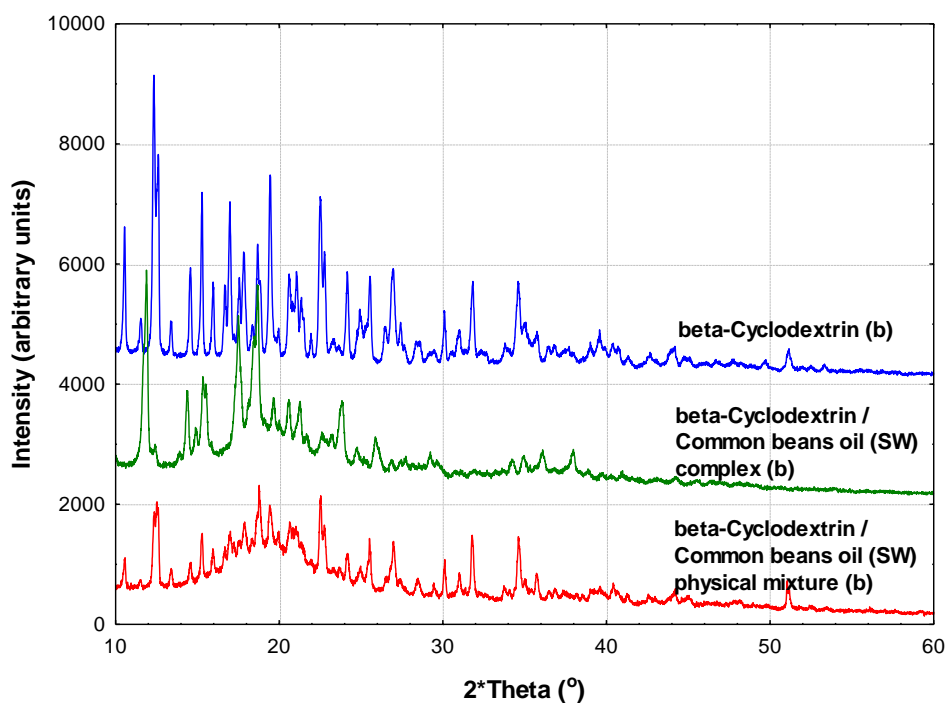

Figure W. Powder X-Ray diffractometry (PXRD) data for  $\beta$ -CD (blue),  $\beta$ -CD/CBO-SW complex (green),  $\beta$ -CD + CBO-SW physical mixture (red) (duplicates “b”)

# Thermogravimetry-Differential Thermogravimetry (TG-DTG) data of $\beta$ -cyclodextrin/common beans oil complexes (duplicates “b”)

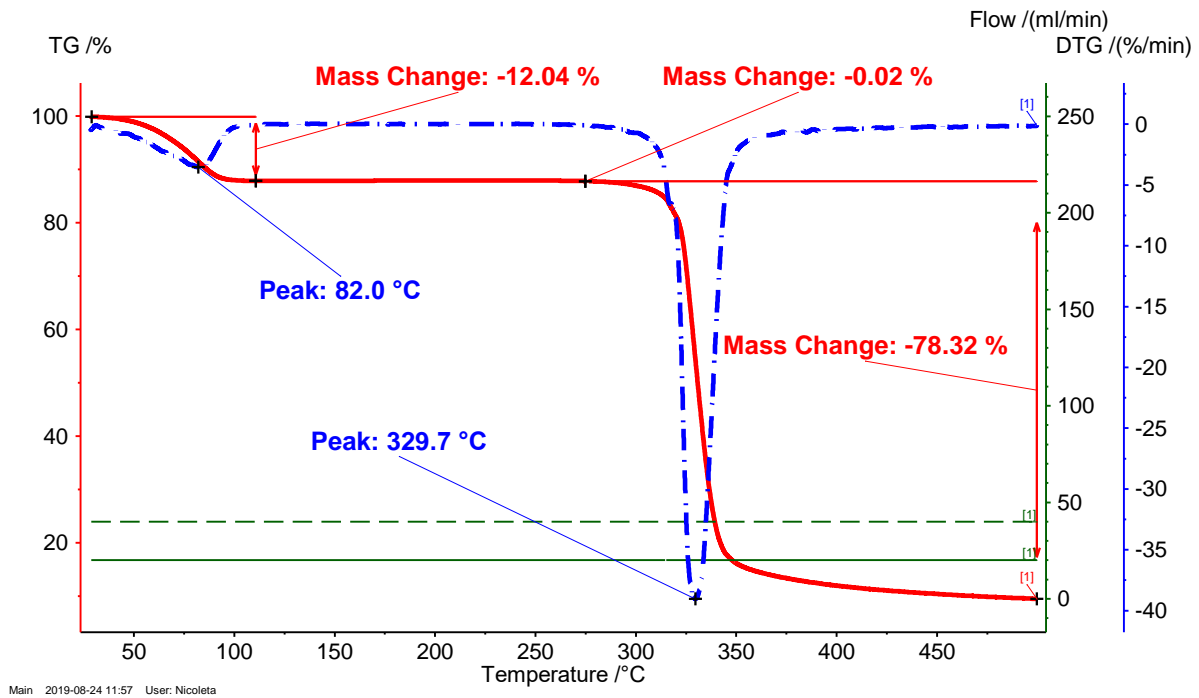

Figure X. Thermogravimetry-differential thermogravimetry (TG-DTG) analysis of  $\beta$ -cyclodextrin ( $\beta$ -CD, duplicate “b”)

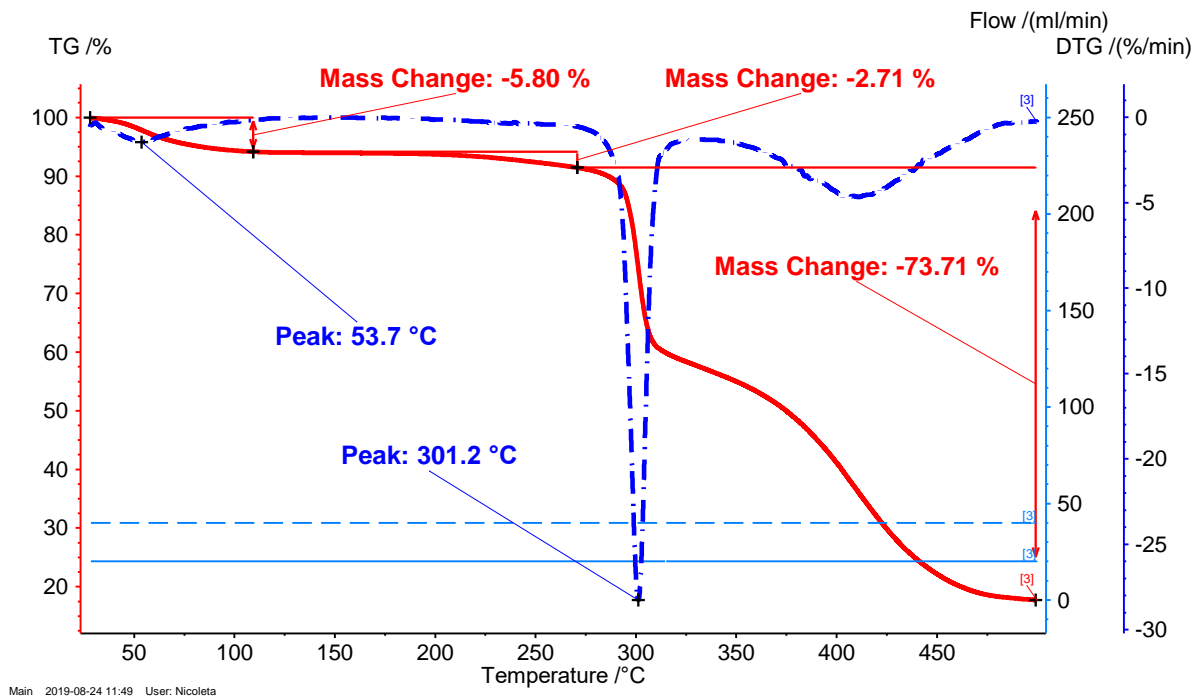

Figure Y. Thermogravimetry-differential thermogravimetry (TG-DTG) analysis of  $\beta$ -cyclodextrin / common beans (North-East) oil complex ( $\beta$ -CD / CBO-NE, duplicate “b”)

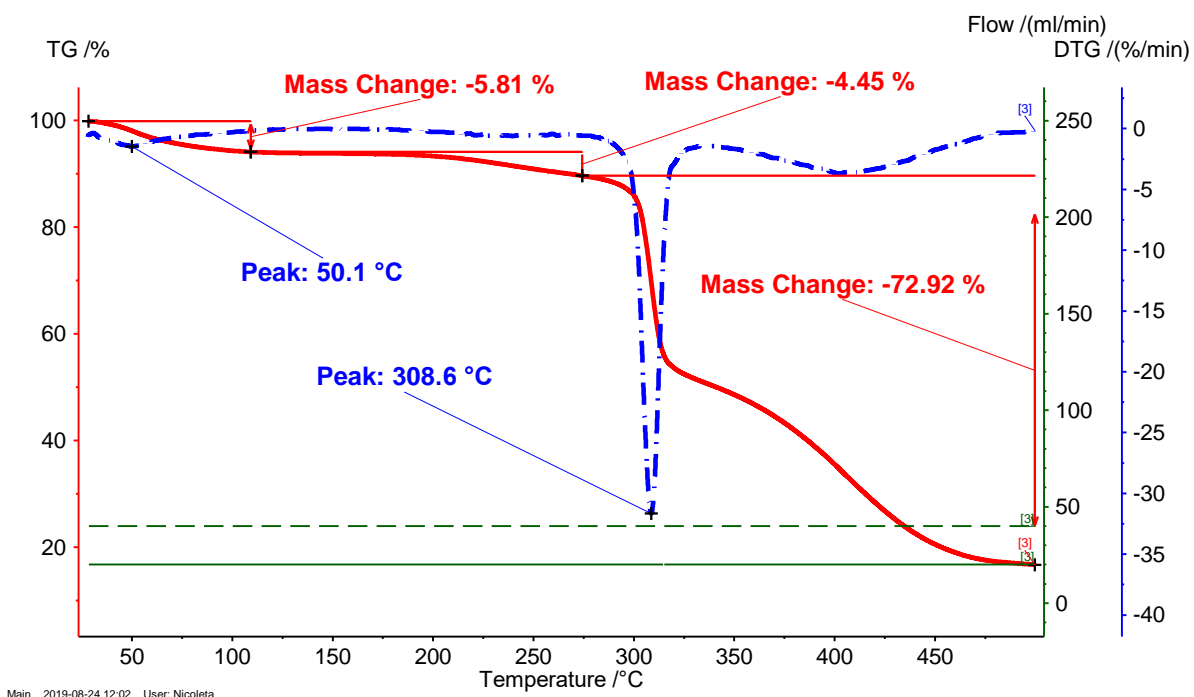

**Figure Z. Thermogravimetry-differential thermogravimetry (TG-DTG) analysis of  $\beta$ -cyclodextrin / common beans (South-West) oil complex ( $\beta$ -CD / CBO-SW, duplicate "b")**



# Differential Scanning Calorimetry (DSC) data of $\beta$ -cyclodextrin/common beans oil complexes (duplicates “b”)

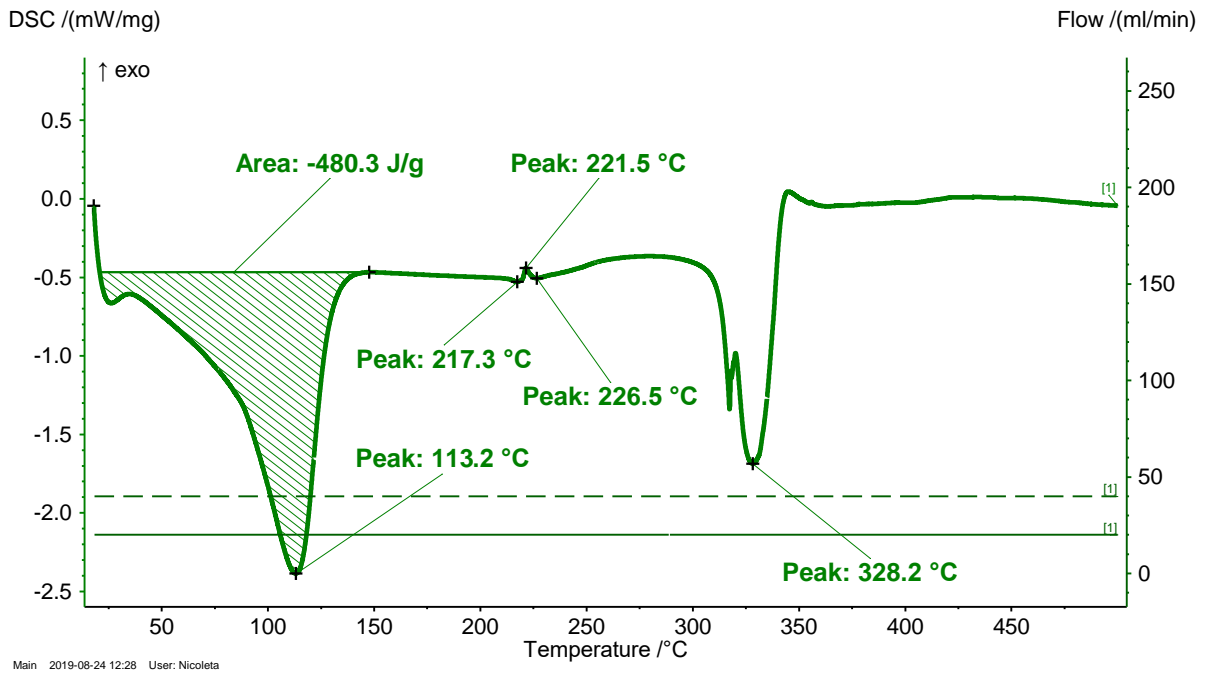

Figure AA. Differential scanning calorimetry (DSC) analysis of  $\beta$ -cyclodextrin ( $\beta$ -CD, duplicate “b”)

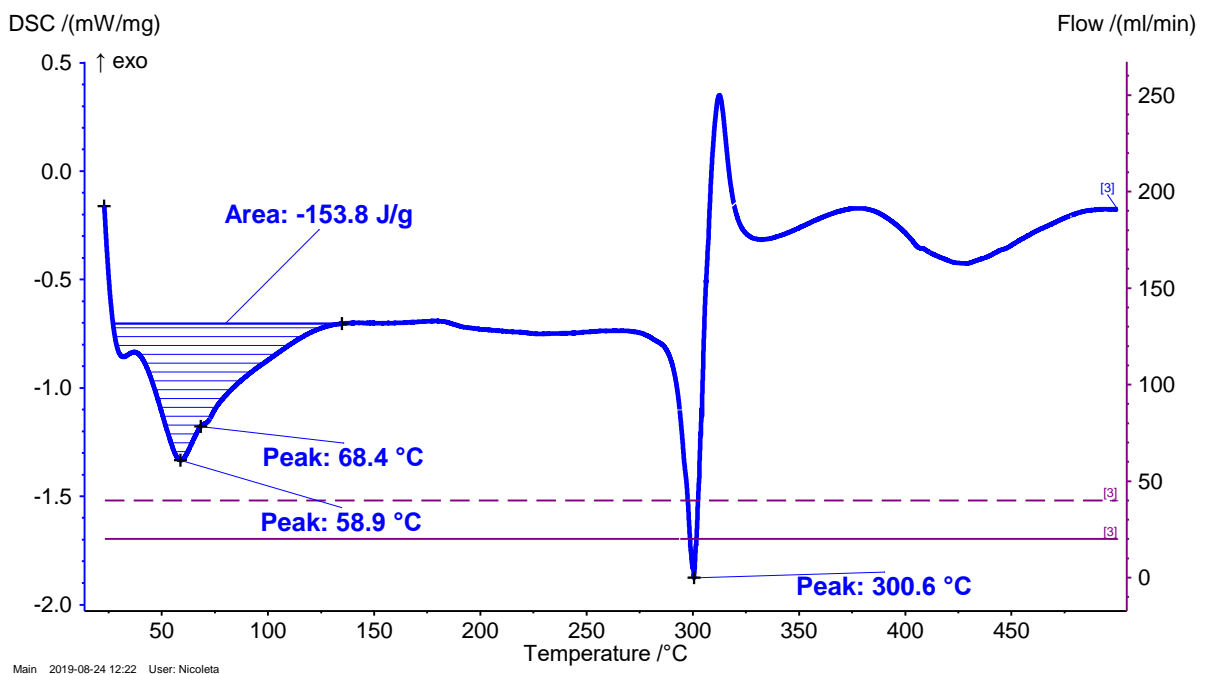

Figure AB. Differential scanning calorimetry (DSC) analysis of  $\beta$ -cyclodextrin / common beans (North-East) oil complex ( $\beta$ -CD / CBO-NE, duplicate “b”)

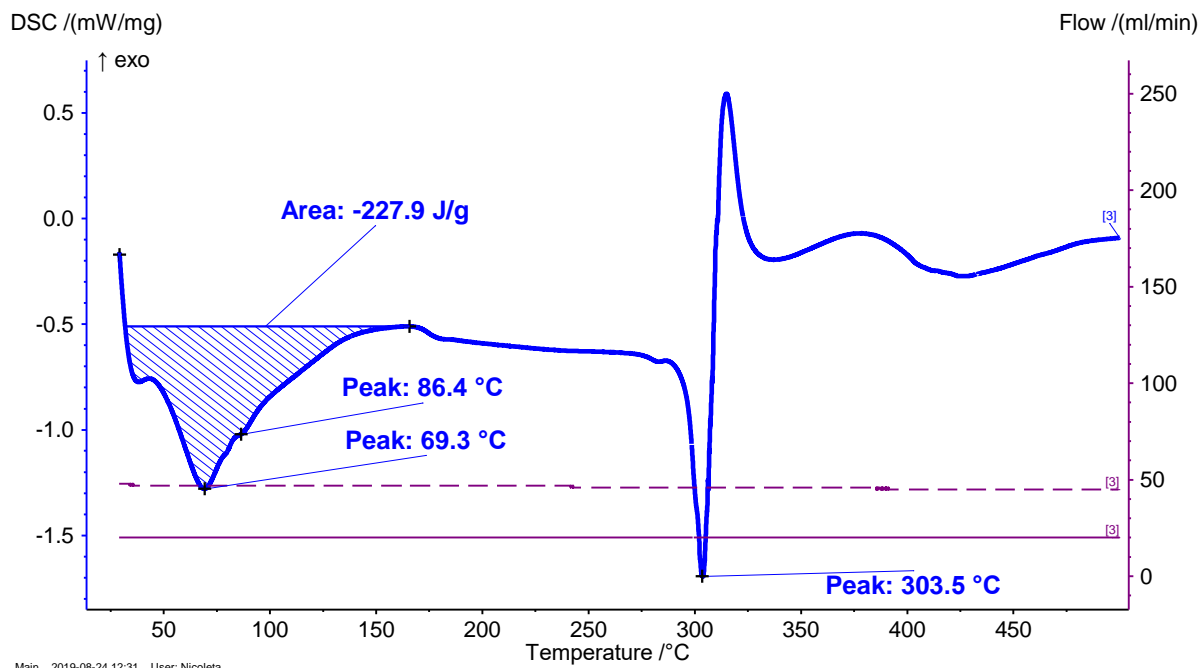

**Figure AC. Differential scanning calorimetry (DSC) analysis of  $\beta$ -cyclodextrin / common beans (South-West) oil complex ( $\beta$ -CD / CBO-SW, duplicate “b”)**
